# Supplementary material for: An Open-Label, Randomised Study of Dihydroartemisinin-Piperaquine Versus Artesunate-Mefloquine for Falciparum Malaria in Asia
Source: PubMed Central journal article supplement (PMC2912766; doi:10.1371/journal.pone.0011880), 2010-07-30
Supplement: pone.0011880.s006.pdf [file pone.0011880.s006.pdf]

**Amendment N°:** 3  
**Protocol N°:** ST3073-ST3074 DM040010

---

**Title:**

**A Phase III, randomized, non-inferiority trial, to assess the efficacy and safety of Dihydroartemisinin+Piperaquine (DHA+PPQ, Artekin) in comparison with Artesunate+Mefloquine (AS+MQ) in patients affected by acute, uncomplicated *Plasmodium falciparum* malaria.**

**- MULTICENTRE STUDY IN ASIA-**

---

**Final protocol dated :** 10 January, 2005  
**Revised protocol incorporating Amendment N° 1, 2& 3 dated:** 24 November 2005  
**Amendment N° 3A (SMRU sites only)dated:** 6 January 2006

---

**PURPOSE:**

This amendment has been formulated in response to specific recommendations from the Thai MoPH.

**MODIFICATION:**

**Page 5: Synopsis Diagnosis and Main Inclusion Criteria**

**Reason for modification:** To amend the age range to reflect that only adults will be recruited

*Therefore:*

Males and Females aged between 3 months and 65 years inclusive, body weight at least 5 Kg, microscopically confirmed, mono-infection of *Plasmodium falciparum* or mixed infection, history of fever or presence of fever (temperature at  $\geq 37.5$  °C), written informed consent

*is modified as follows :*

Males and Females  $\geq 18$  years with microscopically confirmed, mono-infection of *Plasmodium falciparum* or mixed infection, history of fever or presence of fever (temperature at  $\geq 37.5$ °C), written informed consent

**MODIFICATION:**

**Page 22: Section 3. Selection of the Patients**

**Inclusion Criteria Number 1**

**Reason for modification:** To amend the age range to reflect that only adults will be recruited.

*Therefore:*

Males and Females aged between 3 months and 65 years inclusive.

*is modified as follows :*

Males and Females aged  $\geq 18$  years
