# Supplementary material for: An Open-Label, Randomised Study of Dihydroartemisinin-Piperaquine Versus Artesunate-Mefloquine for Falciparum Malaria in Asia
Source: PubMed Central journal article supplement (PMC2912766; doi:10.1371/journal.pone.0011880), 2010-07-30
Supplement: pone.0011880.s007.pdf [file pone.0011880.s007.pdf]

**Amendment N°:** 3B  
**Protocol N°:** ST3073-ST3074 DM040010

---

**Title:**

**A Phase III, randomized, non-inferiority trial, to assess the efficacy and safety of Dihydroartemisinin+Piperaquine (DHA+PPQ, Artekin) in comparison with Artesunate+Mefloquine (AS+MQ) in patients affected by acute, uncomplicated *Plasmodium falciparum* malaria.**

**- MULTICENTRE STUDY IN ASIA-**

---

**Final protocol dated:** 10 January 2005  
**Revised protocol incorporating Amendment N° 1 & 2 dated:** 14 April 2005  
**Revised protocol incorporating Amendment N° 1, 2 & 3 dated:** 24 November 2005  
**Amendment N° 3B (India sites only) dated:** 21 April 2006

---

**PURPOSE:**

The main goal of this amendment is to accommodate local requirements of the sites in India.

**MODIFICATION:**

**Page 5: Synopsis: Diagnosis and Main Inclusion Criteria**

**Reason for modification:** To amend the lower age limit to reflect that only adults will be recruited.

*Therefore:*

Males and Females aged between 3 months and 65 years inclusive, body weight at least 5 Kg, microscopically confirmed, mono-infection of *Plasmodium falciparum* or mixed infection, history of fever or presence of fever (temperature at  $\geq 37.5$  °C), written informed consent

*is modified as follows :*

Males and Females aged  $\geq 18$  years with microscopically confirmed, mono-infection of *Plasmodium falciparum* or mixed infection, history of fever or presence of fever (temperature at  $\geq 37.5$ °C), written informed consent

**MODIFICATION:**

**Page 24: Section 3.7. Selection of the Patients**

**Inclusion Criterion Number 1**

**Reason for modification:** To amend the lower age limit to reflect that only adults will be recruited.

*Therefore:*

Males and Females aged between 3 months and 65 years inclusive.

*is modified as follows :*

Males and Females aged  $\geq 18$  years.

**MODIFICATION:**

**Page 30: Section 4.1. Concomitant Drug Therapies Disallowed**

**Reason for modification:** As chloroquine may still be effective on *Plasmodium falciparum* in some areas in India, the use of chloroquine during the study would be prohibited.

*Therefore:*

Any antimalarial, or antibiotic with antimalarial activity (erythromycin or other macrolides, co-trimoxazole or other sulfonamides, any tetracycline including doxycycline, and quinolones). The exception to this is chloroquine which may be prescribed for non-falciparum infections during follow up.

*is modified as follows :*

Any antimalarial (including chloroquine), or antibiotic with antimalarial activity (erythromycin or other macrolides, co-trimoxazole or other sulfonamides, any tetracycline including doxycycline, and quinolones).

**MODIFICATION:**

**Page 30: Section 4.2. Concomitant Drug Therapies Allowed**

**Reason for modification:** As chloroquine may still be effective on *Plasmodium falciparum* in some areas in India, it would not be categorised as one of the drug treatments allowed.

*Therefore:*

During the trial patients can receive certain prescribed drugs e.g. paracetamol, and non malarial antibiotics (penicillins, cephalosporins), chloroquine.

*is modified as follows :*

During the trial patients can receive certain prescribed drugs e.g. paracetamol, and non malarial antibiotics (penicillins, cephalosporins).
